# Supplementary material for: Further developments towards a genome-scale metabolic model of yeast
Source: Springer Nature journal article supplement (doi:10.1186/1752-0509-4-145), 2010-10-28
Supplement: 12918_2010_556_MOESM3_ESM.pdf [file 12918_2010_556_MOESM3_ESM.pdf]

```
<speciesType metaid="_metaE_1" id="E_1" name="YBL022C">
  <annotation>
    <rdf:RDF xmlns:rdf="http://www.w3.org/1999/02/22-rdf-syntax-ns#"
      xmlns:bqbiol="http://biomodels.net/biology-qualifiers/">
      <rdf:Description rdf:about="#_metaE_1">
        <bqbiol:isDescribedBy>
          <rdf:Bag>
            <rdf:li rdf:resource="urn:miriam:pubmed:8276800" />
          </rdf:Bag>
        </bqbiol:isDescribedBy>
        <bqbiol:is>
          <rdf:Bag>
            <rdf:li rdf:resource="urn:miriam:uniprot:P36775" />
          </rdf:Bag>
        </bqbiol:is>
        <bqbiol:isEncodedBy>
          <rdf:Bag>
            <rdf:li rdf:resource="urn:miriam:sgd:S000000118" />
          </rdf:Bag>
        </bqbiol:isEncodedBy>
      </rdf:Description>
    </rdf:RDF>
  </annotation>
</speciesType>
```
