# Supplementary material for: Further developments towards a genome-scale metabolic model of yeast
Source: Springer Nature journal article supplement (doi:10.1186/1752-0509-4-145), 2010-10-28

iMM904

iIN800

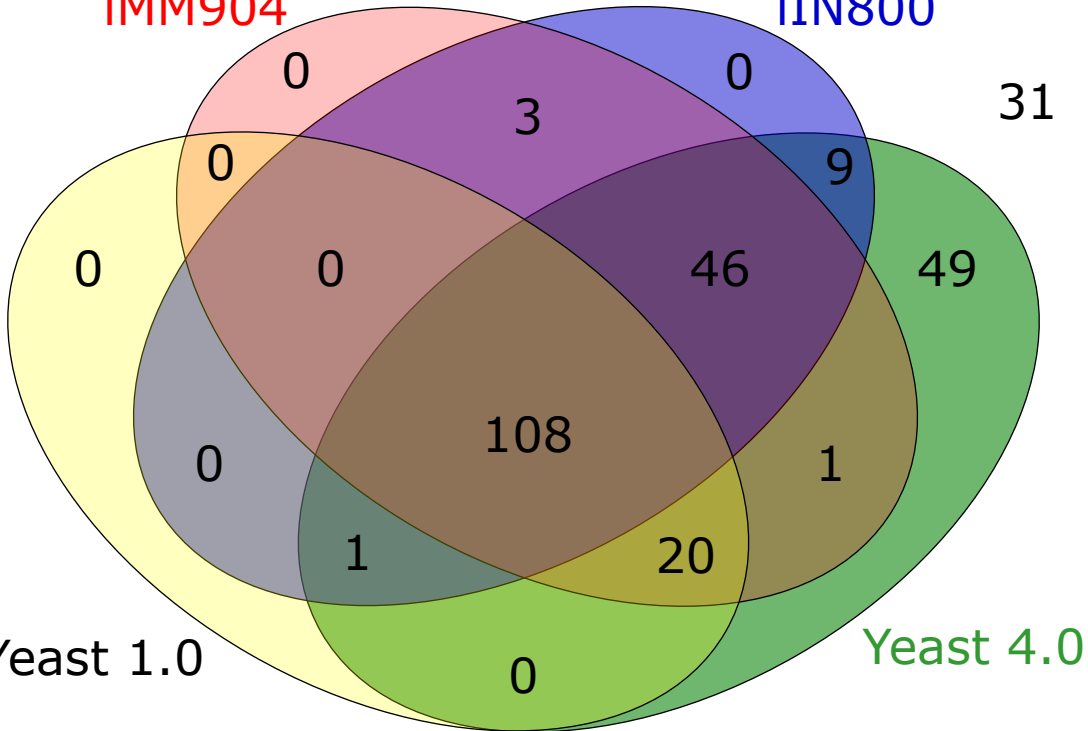

Supplement: 12918_2010_556_MOESM5_ESM.pdf [file 12918_2010_556_MOESM5_ESM.pdf]
